# Supplementary material for: The role of KDEL-tailed cysteine endopeptidases of Arabidopsis (AtCEP2 and AtCEP1) in root development
Source: PubMed Central journal article supplement (PMC6303060; doi:10.1371/journal.pone.0209407), 2018-12-21
Supplement: pone.0209407.s002.pdf [file pone.0209407.s002.pdf]

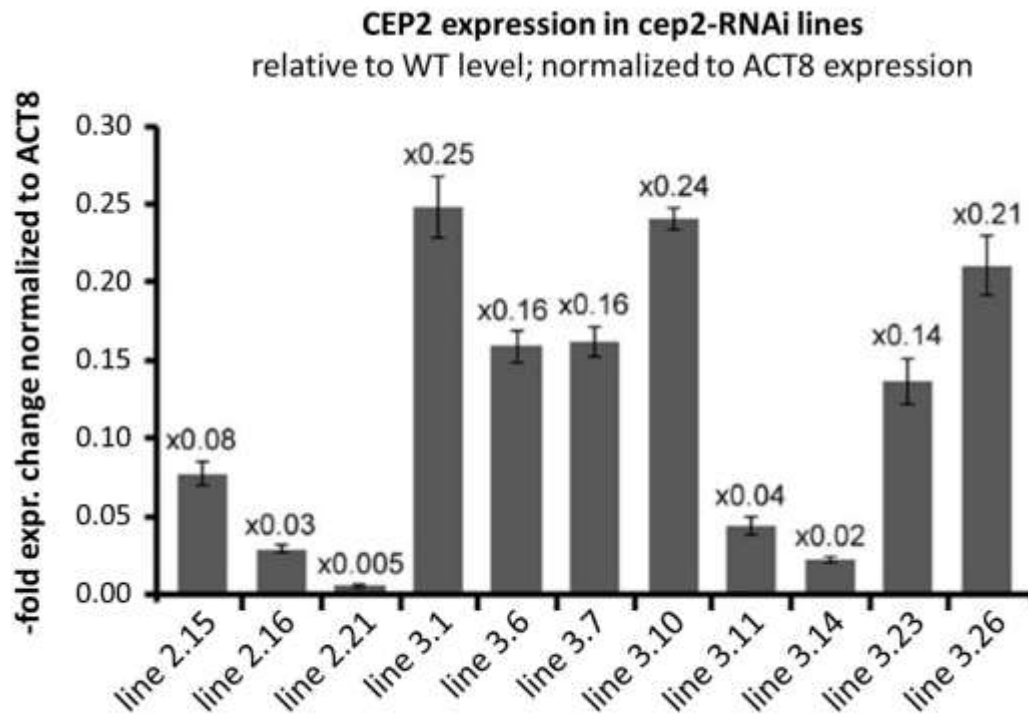

**S2 Fig. *CEP2* expression in independent lines of *cep1/2* double ko/kd mutants (*cep1+cep2-RNAi*).** Relative gene expression of *CEP2* was measured in seven days old seedlings. qRT-PCR was performed with *CEP2* gene-specific primers. Expression levels were normalized to the reference gene *ACT8* and expression in wild type Col-0 was set to 1. Error bars represent standard error of the mean (SE). The results were similarly reproduced in a second independent experiment (biological replicate).
