# Supplementary material for: The role of KDEL-tailed cysteine endopeptidases of Arabidopsis (AtCEP2 and AtCEP1) in root development
Source: PubMed Central journal article supplement (PMC6303060; doi:10.1371/journal.pone.0209407), 2018-12-21
Supplement: pone.0209407.s003.pdf [file pone.0209407.s003.pdf]

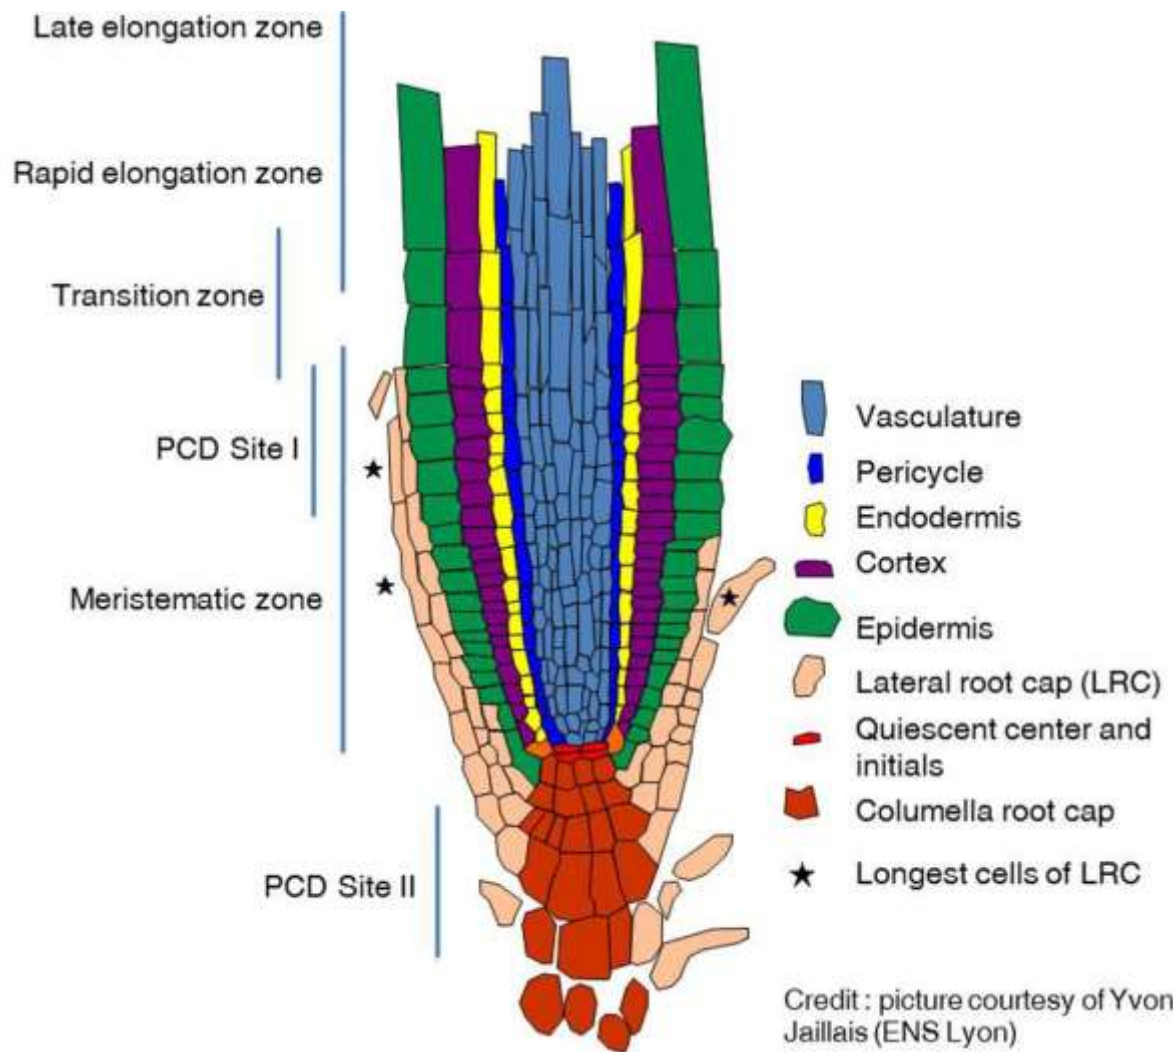

**S3 Fig. Morphological organization of the *Arabidopsis* root tip.** (Kindly provided by Yvon Jaillais (ENS Lyon; yvon.jaillais@ens-lyon.fr))
