# Supplementary material for: The role of KDEL-tailed cysteine endopeptidases of Arabidopsis (AtCEP2 and AtCEP1) in root development
Source: PubMed Central journal article supplement (PMC6303060; doi:10.1371/journal.pone.0209407), 2018-12-21
Supplement: pone.0209407.s006.pdf [file pone.0209407.s006.pdf]

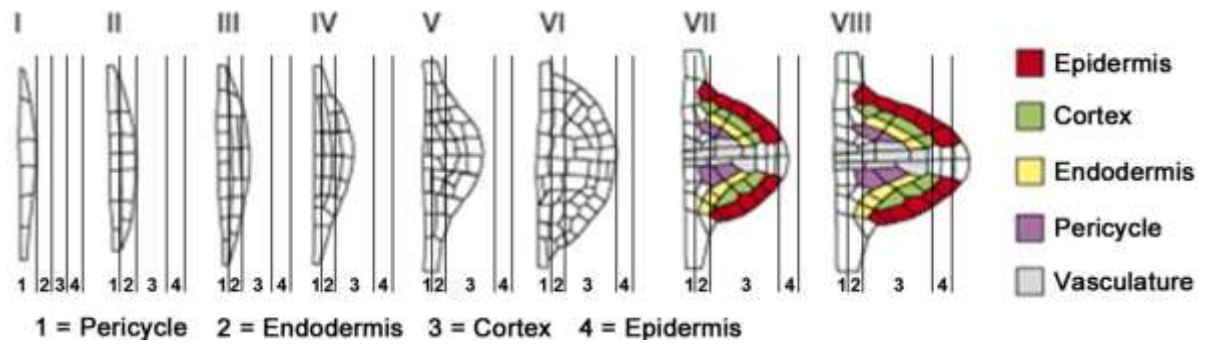

**S6 Fig. Morphological changes during lateral root development.** Lateral roots originate deep within the primary root from the pericycle cells. The eight stages of primordium development (roman numbers) are shown [adapted from Péret B, Rybel B, de Casimiro I, Benková E, Swarup R, Laplaze L et al. (2009) *Arabidopsis* lateral root development: an emerging story. *Trends in Plant Sci* 14: 99–408. doi:10.1016/j.tplants.2009.05.002].
